# Supplementary material
Source: Copernicus journal article supplement (doi:10.5194/egusphere-2025-4516)
Supplement: Supplementary file [file egusphere-2025-4516-RC2-supplement.pdf]

# EigenFlux: A Stable Multi-Stream Radiative Transfer Method for Strongly Backward-Scattering Media

Daniel P. Johnson

Retired, Aerospace Research Fellow

Matthew S. Johnson

[ms.j@chem.ku.dk](mailto:ms.j@chem.ku.dk)

University of Copenhagen

---

## Research Article

**Keywords:** Radiative Transfer, Asymmetrical Scattering, Atmospheric Physics, Light Propagation, Material Science, Remote Sensing

**Posted Date:** September 30th, 2025

**DOI:** <https://doi.org/10.21203/rs.3.rs-3966645/v2>

**License:**  This work is licensed under a Creative Commons Attribution 4.0 International License.

[Read Full License](#)

**Additional Declarations:** The authors declare no competing interests.

---

# 1 EigenFlux: A Stable Multi-Stream Radiative Transfer 2 Method for Strongly Backward-Scattering Media

3 Daniel P. Johnson<sup>1,\*</sup> and Matthew S. Johnson<sup>2,\*</sup>

4 <sup>1</sup>Retired, Aerospace Research Fellow, Fridley, MN, USA

5 <sup>2</sup>Department of Chemistry, University of Copenhagen, Copenhagen Denmark

6 \*drdpj@comcast.net, msj@chem.ku.dk

## 7 ABSTRACT

The radiative transfer (RT) of light and radiation through a medium such as an atmosphere, pigment, or water is of interest to many research communities, such as atmospheric physics and chemistry, meteorology, climate research, astronomy, remote sensing, painting and coating material science, oceanography, hydrology, and graphics rendering. **Despite its many uses, to the best of our knowledge there is not a non-commercial multi-stream algorithm capable of handling strongly backwards scattering systems with asymmetries in excess of  $-0.95$ .** In this paper we present an derivation and implementation of the EigenFlux system which incorporates use of a Mesh Approximates multistream and eigenvalue decomposition with numerical stability achieved through the use of a natural reflectance condition. We conclude with numerical demonstrations of the range and precision of the method.

## 9 Introduction

10 The fundamental theory of light scattering in the atmosphere was developed by Lord Rayleigh in 1871<sup>34</sup>. Rayleigh scattering  
11 remains fundamental to the field of radiative transfer today. The earliest known formulations of the modern radiative transfer  
12 equation (RTE) were published by Eugen Von Lommel in 1887<sup>25</sup>, and an integral version by Orest Chwolson in 1889<sup>23</sup>.  
13 However, neither publication spread to the general academic community<sup>6</sup>.

14 In 1905, Schuster used hemispheric isotropy to develop and publish a two-stream RTE and its analytical solution<sup>35</sup> and has  
15 been traditionally credited with originating the RTE, although a similar two-stream approximation was presented by Eddington  
16 in 1916<sup>11</sup>. Papers by Schwarzschild in 1906 and 1914, and by Milne in 1921 on thermodynamic equilibrium within solar  
17 and stellar atmospheres led to the establishment of the RTE in its general form<sup>24,36,37</sup>. A full analytic theory of the RTE was  
18 developed and published by Chandrasekhar in 1950<sup>5</sup>.

19 In the meantime, Kubelka and Munk developed a simplified two-constant RTE and its solution in 1931<sup>18,19</sup> that is equivalent  
20 mathematically to Schuster's. Whereas Eddington and Shuster's two-stream RTE and subsequent modifications<sup>21,29</sup> have been  
21 considered only appropriate for mediums without strong asymmetry, Kubelka-Munk's method is accurate for determining the

22 reflectance of materials which are very strongly backscattering or forward-scattering. As a result, K-M and its modifications  
23 have become the standard for use by the painting and coating industries<sup>17</sup> where the most useful pigments tend to be those with  
24 extreme scattering properties.

25 A modern study which uses the K-M method is the Lawrence Berkeley National Laboratories study into pigments for  
26 roofing materials that show color in the visible spectrum, but are transparent in IR and UV so as to remain cool even under solar  
27 heating<sup>1</sup>. The study determined the scattering and absorbing properties of 85 candidate materials. Most materials were found to  
28 be strongly forward scattering<sup>20</sup>.

29 Researchers in atmospheric physics/chemistry and oceanographers were interested in solutions to the full RTE in order to  
30 understand the effects of solar flux. The 1970's saw the development of a variety of RTE solvers starting from Chandrasekhar's  
31 work<sup>5</sup>, including the popular DISORT solver<sup>39</sup> available as public source code, both as a stand-alone distribution<sup>22</sup> and as part  
32 of the RadTranLib distribution<sup>13</sup>.

33 Astronomers and meteorologists were interested in the RTE as a way of understanding the albedo of the Earth and other  
34 planets<sup>7</sup>. Of interest here is the formulation and standardization of the Bi-Directional Radiation Field (BDRF)<sup>27,43</sup>.

35 Application of the RTE to oceans began as early as 1922 when Raman<sup>33</sup> invoked scattering to explain the color of the  
36 sea. Scattering due to suspended particles and water turbulence play a major role in determining the color<sup>38</sup>. The resulting  
37 mathematics was given a firm footing by Preisendorfer's 6 Volume *Hydrologic Optics*<sup>26,31,32</sup>. The work of Akkaynak and  
38 Treibitz provides an interesting example of the use of the RTE in color-correction of underwater imaging<sup>2</sup>.

39 The Hydrolight tool<sup>15</sup> is a commercial tool that can directly solve hydrological depth-varying absorbance and scattering  
40 problems, including systems with strong forward scattering. It is coded specifically for hydrological problems and does not  
41 address atmospheric radiative transfer or radiative transfer within pigmented materials.

42 A simplified form of the RTE was introduced by Blinn<sup>3</sup> as an approach to rendering realistic scenes in computer graphics in  
43 1984. This was expanded into a generalized Light Transport Theory a few years later by Kajiya<sup>16</sup>. Although the initial impetus  
44 was primarily for models that are easy to compute and appear to be realistic, but are not necessarily accurate to the physics,  
45 advances in computer technology have allowed the increased use of physically-realistic models<sup>30</sup>.

46 The complexity of rendering lighting and atmospheric effects in computer-generated imagery means that the leading  
47 rendering technology is based on ray-tracing and Monte-Carlo sampling. These methods provide an important alternative  
48 to the more traditional RTE solvers. An example is the MYSTIC code<sup>12</sup> which is included in the RadTranLib public source  
49 distribution<sup>13</sup> along with the more traditional DISORT solver<sup>39</sup>.

50 The *Mesh Approximates* (MA) method presented here is closely related to the classic *Discrete Ordinates* (DO) method  
51 presented by Chandrasekhar<sup>5</sup> (we follow the presentation by Goody and Yung<sup>14</sup> and the paper by Stamnes, et al.<sup>39</sup>).

52 Both methods start with the integro-differential equation (3) with boundary conditions for the diffuse intensity with an  
53 explicit expression for the direct intensity.

54 DO first defines a finite-dimensional approximation of the integral terms to generate a linear ODE. That finite-approximation

55 uses a Legendre approximation of the phase matrix, and Gaussian quadrature for the integrals, which is mathematically  
56 equivalent to using Legendre polynomial expansions for the integrands.

57 To solve the resulting Ordinary Differential Equations (ODE), DO performs an eigenvalue decomposition to get a system of  
58 uncoupled ODEs, half of which are unstable. DO expresses the uncoupled ODEs and boundary conditions as an algebraic  
59 eigenvalue problem, which is then solved using specialized algorithms for that purpose.

60 MA first approximates the original equation using a piecewise-linear approximation of the phase matrix and the diffuse  
61 intensity, with exact evaluation of the resulting integrands over each piece-wise linear interval.

62 As in the previous method, the next step is to use an eigenvalue decomposition to solve the resulting Ordinary Differential  
63 Equations (ODE) to get a system of uncoupled ODEs, half of which are unstable. It stabilizes the uncoupled ODEs by  
64 initialing solving them using a natural reflectance assumption (equivalent to the assumption of an infinitely thick atmosphere).  
65 Piecewise-linear mesh approximations are again applied along the depth axis and to the boundary conditions in order to  
66 generate a well-conditioned linear system which can be solved with standard algorithms. The downward solution is then  
67 linearly combined with the reflected upward solution to generate the original two-boundary solution.

68 The DO method is limited by the fit using Legendre polynomials, which in particular converge slowly at the endpoints,  
69 making it difficult to use for strongly forward or backward scattering problems. The MA approach allows for the use of any  
70 subdivision of the ordinates, both for the multi-streams and along the depth axis. This allows for the use of meshes designed to  
71 resolve the underlying dynamics, for forward and backward scattering problems of up to  $\pm 0.99$  asymmetry for the existing  
72 implementations.

73 Like the DO, the MA is limited to application to plane-parallel homogeneous media. In both cases, the method is used to  
74 generate solutions to multiple layers with varying characteristics which can be combined into an overall heterogeneous solution.

## 75 Theoretical Development

76 We investigate *radiative transfer* through a homogeneous media, illuminated from its surface, that contains a uniform mix of  
77 pigment particles which may absorb or scatter light particles that are traveling through the media. We will limit this investigation  
78 to the plane-parallel situation, in which we only model the *depth* to which a light particle has penetrated, (increasing as the light  
79 particle descends deeper), the *relative velocity* (the cosine of the angle of travel relative to the vertical), and its *azimuth* (the  
80 angle of travel relative to the medium's "north").

81 The intensity function is interpreted here as the probability that a light particle is at depth  $y$  in the media, and has a relative  
82 velocity of  $v$ , where  $v = \cos(\theta)$ . So  $(v = 1, \theta = \pi/2)$  is straight down,  $(v = 0, \theta = 0)$  is horizontal, and  $(v = -1, \theta = -\pi/2)$   
83 is straight up.

84 The pigment particles may either absorb or scatter a light particle encountering them. This paper does not consider emission  
85 from the pigment, since that is a minor issue in determining color and transparency. The scatter distribution is determined by a  
86 rotationally symmetric phase function with asymmetry parameter  $g$  governing the degree of local backscatter versus forward

87 scatter.

88 Further information and background can be found in the references<sup>14,17,29</sup>.

## 89 Key Variables and Functions

|                              |                                                                 |
|------------------------------|-----------------------------------------------------------------|
| $\theta$                     | Angle of travel of light particle, relative to vertical         |
| $\phi$                       | Azimuth of travel of light particle, relative to north          |
| $v = \cos \theta$            | Velocity relative to vertical                                   |
| $x$                          | Depth                                                           |
| 90 $y$                       | Depth scaled to extinction path length                          |
| $z$                          | Exponential depth $z = e^{-y/\hat{y}_{05}}$                     |
| $\tilde{I}(v, x, \phi)$      | Intensity distribution                                          |
| $I(v, y, \phi)$              | Intensity distribution with respect to $y$                      |
| $s(v, \phi) = I(v, 0, \phi)$ | Intensity distribution at top boundary (source illumination)    |
| $K(v, w)$                    | Normalized phase scattering distribution (parametrized by $g$ ) |

## 91 Model Parameters

|                |                                                                                                        |
|----------------|--------------------------------------------------------------------------------------------------------|
| $\sigma$       | Extinction path length for light to interact with pigment particles                                    |
| $\omega$       | Single scatter albedo (=scattered/(scattered+absorbed))                                                |
| 92 $g$         | phase function scattering asymmetry parameter                                                          |
| $\hat{y}_{05}$ | two-stream estimate of the depth at which the transmission<br>was reduced to 5% of the original source |

93  
94 Under stationary conditions, the intensity distribution (1) satisfies Schwartzchild's Equation<sup>29</sup>. Note that the emission  
95 term is not included as its contribution is not important for our intended application to pigment color.

$$\sigma \tilde{I}(v, x, \phi) + v \partial_x \tilde{I}(v, x, \phi) = \omega \sigma \int K(v, w) \tilde{I}(w, x, \phi) dw \quad (1)$$

96 After normalization with  $\sigma$ , this becomes

$$I(v, y, \phi) + v \partial_y I(v, y, \phi) = \omega \int K(v, w) I(w, y, \phi) dw \quad (2)$$

97 For pedagogical purposes we now choose to simplify the derivation by considering only azimuth-averaged input sources,  
98 allowing us to use an azimuth-independent formulation. See Subsection *Incorporating Azimuth-dependence* below for further  
99 details on the additional considerations for azimuth-dependent sources.

100 The *natural reflectance* of a material is the reflectance of a sample that is effectively opaque, e.g. adding additional depth  
 101 does not change the reflectance significantly. In considering atmospheric radiation, this would be the assumption of an infinitely  
 102 deep atmosphere (without the attendant pressure increase). In considering paints and coatings, this would be the assumption of  
 103 a completely opaque film.

104 The left-hand side of equation (2) is a first-order linear differential equation in  $y$ , so we can write down the standard textbook  
 105 solution with the initial boundary condition  $s(\nu)$ .

$$I(\nu, y) = s(\nu) e^{-y/\nu} + \omega(1/\nu) e^{-y/\nu} \int_{\eta=0}^y \int_{w=-1}^1 e^{\eta/\nu} K(\nu, w) I(w, \eta) dw d\eta$$

106 However, for  $\nu < 0$ ,  $e^{-y/\nu}$  is unbounded in  $y$ , and under the natural reflectance condition, the light exiting the surface,  
 107  $I(\nu, 0)$  for  $\nu \leq 0$  should be solely determined by the light entering the surface,  $I(\nu, 0)$  for  $\nu \geq 0$ .

108 By using a second boundary at depth  $M$  for the light moving up, we can get a two-sided equation in which we specify  
 109  $I(\nu, 0)$  for  $\nu \geq 0$  for light moving from the surface to the bottom, and  $I(\nu, M)$  for  $\nu \leq 0$  for light moving from the bottom to the  
 110 surface.

For  $\nu \geq 0$ ,

$$I(\nu, y) = s(\nu) e^{-y/\nu} + (\omega/\nu) e^{-y/\nu} \int_{\eta=0}^y \int_{w=-1}^1 e^{\eta/\nu} K(\nu, w) I(w, \eta) dw d\eta$$

For  $\nu < 0$ ,

$$I(\nu, y) = s_M(\nu) e^{(M-y)/\nu} - (\omega/\nu) e^{-y/\nu} \int_{\eta=y}^M \int_{w=-1}^1 e^{\eta/\nu} K(\nu, w) I(w, \eta) dw d\eta$$

111 Now apply the natural reflectance condition by letting  $M \rightarrow \infty$  under the condition that  $s_M(\nu)$  is bounded, which results in

For  $v \geq 0$ ,

$$I(v, y) = s(v) e^{-y/v} + (\omega/v) e^{-y/v} \int_{\eta=0}^y \int_{w=-1}^1 e^{\eta/v} K(v, w) I(w, \eta) dw d\eta$$

For  $v < 0$ ,

$$I(v, y) = -(\omega/v) e^{-y/v} \int_{\eta=y}^{\infty} \int_{w=-1}^1 e^{\eta/v} K(v, w) I(w, \eta) dw d\eta$$

112 As desired, the light exiting the surface,  $I(v, 0)$  for  $v \leq 0$ , is determined by the light entering the surface,  $I(v, 0)$  for  $v \geq 0$ .

113 Figure 1 shows the intensities for a strongly backscattering media.

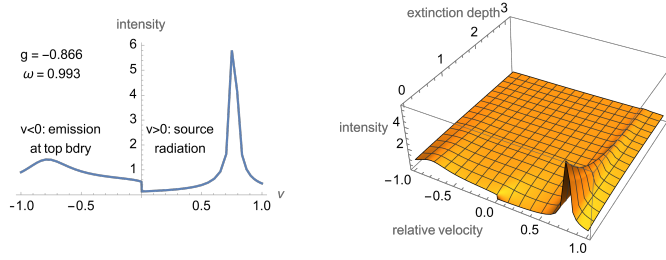

**Figure 1.** Intensities for strongly backscattering media: (left) source and emission radiation. (right) internal intensities.

114 Now we turn our attention back to the basic equation (2). This can be decomposed into two parts, the *direct* component  
 115 which is the intensity of the source rays before they are scattered or absorbed (also known as *extinction*), and the *diffuse*  
 116 component which is the intensity of the scattered light. Furthermore, we can immediately determine the form of the direct  
 117 component,

118 We define the two components of the intensity as

$$R(v, y) = e^{-y/v} s(v) \quad \text{Direct intensity distribution}$$

$$M(v, y) = I(v, y) - R(v, y) \quad \text{Diffuse intensity distribution}$$

120 with the boundary condition  $\forall v > 0, I(v, 0) = s(v)$ . Substituting these definitions into equation (2), we obtain the basic  
 121 equation and side condition for the diffuse component.

$$M(v,y) + v \partial_y M(v,y) - \omega \int K(v,w)M(w,y) dw = \omega \int K(v,w)R(w,y) dw \quad (3)$$

$$\forall v > 0, M(v,0) = 0$$

122 Figure 2 shows the internal direct intensity, which depends on the distribution of the source radiation and the extinction  
 123 depth.

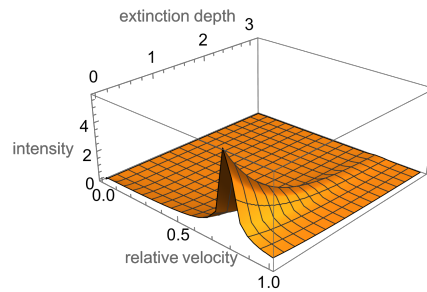

**Figure 2.** Internal direct intensity, depending on the distribution of the source radiation and the extinction depth.

124 Figure 3 shows the intensities for strongly forward scattering and backscattering media.

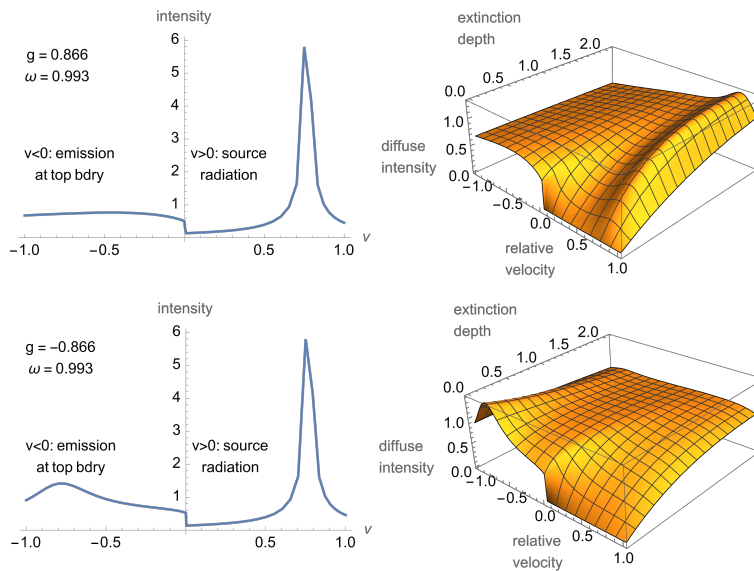

**Figure 3.** Internal diffuse intensities: (top) strongly forward scattering media, (bottom) strongly backscattering media.

125 We will be using a framework of basis functions and test functions to generate a *mesh approximation* for the various  
 126 functions that constitute the full solution.

127

|                                                     |                                            |
|-----------------------------------------------------|--------------------------------------------|
| $v_i$                                               | Approximation points for relative velocity |
| $\phi_i(v)$                                         | Basis functions                            |
| $\psi_i(v)$                                         | Test functions                             |
| $\tilde{f}(v) = \sum f_i \phi_i(v)$                 | Approximating form for 1D functions        |
| $\tilde{h}(v, w) = \sum h_{ij} \phi_i(v) \phi_j(w)$ | Approximating form for 2D functions        |

When seeking an approximate  $\tilde{f}(v) \approx g(v)$ , we expand  $\tilde{f}$  and integrate both against the test functions to get the linear equation which can be solved for the approximating coefficients.

$$\forall i, \sum_j f_j \int \psi_i(v) \phi_j(v) dv = \int \psi_i(v) g(v) dv$$

Any reasonable subdivision of points can be used for  $v_i$ . In this paper,  $v_i$  will be the concatenation of two sets of the Chebyshev points, one "arc" for  $-1 \leq v \leq 0$  and another for  $0 \leq v \leq 1$ . The basis functions  $\phi_i$  are triangular bump functions centered on the mesh points. We will be using two different choices for test functions in the course of this paper, either

- $\psi_i = \phi_i$  where the test functions are the basis functions themselves, or
- $\psi_i(v) = \delta[v = v_i]$  where the test functions are the Dirac delta functions, basically defining  $\tilde{f}$  by sampling it at the mesh points.

Using (2) results in equations that are simpler, faster, and frequently better conditioned than (1), but using (1) preserves more of the symmetric properties of the original problem. So we use a mixture, (1) when additional symmetry is required, and (2) when expediency requires it.

To solve (3), we use an *eigenvalue expansion* of the linear system generated by the mesh approximation.

|                                                  |                                |
|--------------------------------------------------|--------------------------------|
| $K(v, w) = \sum_{jp} K_{jp} \phi_j(v) \phi_p(w)$ | Phase function kernel          |
| $s(v) = \sum_j s_j \phi_j(v)$                    | Intensity at surface           |
| $M(v, y) = \sum_j M_j(y) \phi_j(v)$              | Diffuse intensity distribution |

From this we derive the finite dimensional linear ODE.

$$\begin{aligned} \sum_j A_{ij} \partial_y M_j(y) + \sum_j B_{ij} M_j(y) - \omega \sum_{jp} B_{ij} K_{jp} C_{pq} M_q(y) \\ = \omega \sum_{jp} B_{ij} K_{jp} D_{pq}(y) s_q \end{aligned} \quad (4)$$

149 where

$$150 \quad A_{ij} = \int v \psi_j(v) \phi_j(v) dv$$

$$151 \quad B_{ij} = \int \psi_j(v) \phi_j(v) dv$$

$$152 \quad C_{ij} = \int \phi_j(v) \phi_j(v) dv$$

$$153 \quad D_{ij}(y) = \int e^{-y/v} \phi_j(v) \phi_j(v) dv$$

154 More succinctly,

$$A \partial_y M(y) + (B - \omega BKC) M(y) = \omega BKD(y) s$$

155 The matrix  $A$  is near-singular at  $v = 0$ , but  $(B - \omega BKC)$  is diagonally dominant and non-singular. So we can look at the  
156 eigenvalue decomposition of  $(B - \omega BKC)^{-1} A$  for eigenvalues  $v_k$  and eigenvectors  $Q_k$ . The resulting ODE becomes

$$v_k \partial_y \mu_k(y) + \mu_k(y) = \rho_k(y) \quad (5)$$

157 where

|             |                                       |
|-------------|---------------------------------------|
| $v_k, Q_k$  | Eigenvalues and eigenvectors          |
| $\mu_k(y)$  | Eigenvector decomposition of $M_j(y)$ |
| $\rho_k(y)$ | Transformed boundary data             |

159 and

$$160 \quad A Q_k = v_k (B - \omega BKC) Q_k$$

$$161 \quad M_j(y) = \sum_k Q_k \mu_k(y)$$

$$162 \quad \rho_k(y) = \omega Q^{-1} (B - \omega BKC)^{-1} BKD(y) s$$

163 Figure 4 shows the computed eigenvalues for varying parameter values.

164 Figure 5 shows the computed eigenvectors for a single set of the parameter values. Note in particular the all-positive  
165 eigenvectors for  $v = \pm 1.8$ . These are the limiting distributions of the intensity.

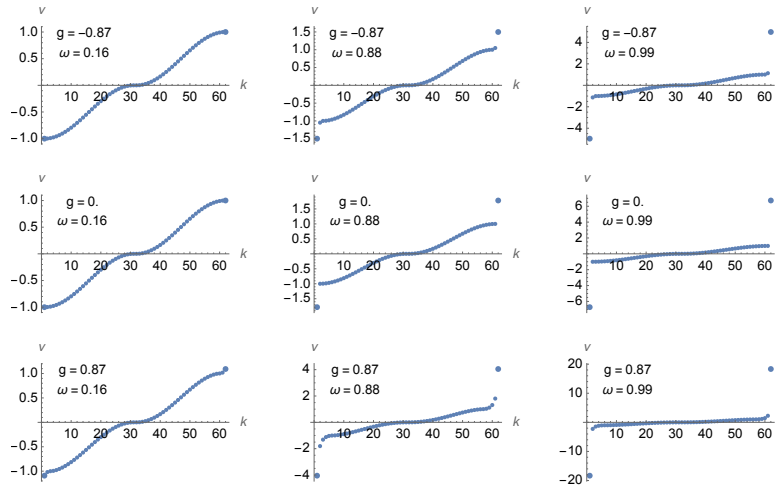

**Figure 4.** Eigenvalues for varying values of asymmetry  $g$  and scatter fraction  $\omega$ .

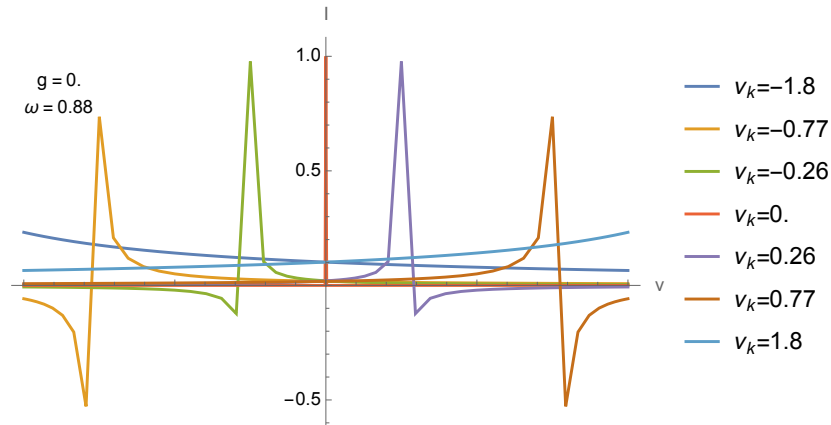

**Figure 5.** Sampling of eigenvectors for a single run.

166 We now have decomposed the problem into a set of one-dimensional first-order linear ODEs which have the general solution  
 167 form

$$\mu_k(y) = \mu_k(0)e^{-y/v_k} + (1/v_k) \int_0^y e^{(\eta-y)/v_k} \rho_k(\eta) d\eta \quad (6)$$

168 However, there are two additional considerations—

169 One of the eigenvalues will be close to (or equal to) 0. In this case, we can go back to (5) and use the resulting condition  
 170  $\mu_k(y) = \rho_k(y)$ .

171 If the eigenvalue is negative, (6) would imply that we have an unstable mode. In this case, we can apply the natural  
 172 reflectance assumption discussed previously to the new ODEs.

173 With these considerations, we have the following more specific solution.

$$\begin{aligned}
 v_k > 0 &\implies \mu_k(y) = \mu_k(0)e^{-y/v_k} + (1/v_k) \int_0^y e^{(\eta-y)/v_k} \rho_k(\eta) d\eta \\
 v_k = 0 &\implies \mu_k(y) = \rho_k(y) \\
 v_k < 0 &\implies \mu_k(y) = -(1/v_k) \int_y^\infty e^{(\eta-y)/v_k} \rho_k(\eta) d\eta
 \end{aligned} \tag{7}$$

174 Note in particular that this implies that for  $k : v_k \leq 0$ ,  $\mu_k(0)$  is determined by  $\rho_k$  (and hence by  $\rho_0$ ). For positive  $v_k$ ,  
 175 determination of  $\mu_k(0)$  is slightly more complicated– they are determined by taking the side-condition  $v > 0 \implies M[v, 0] = 0$   
 176 (see (3) ), expanding by  $M_j(0) = \sum_k Q_k \mu_k(0)$  (see (5)) and solving for the unknown  $\mu_k(0)$ .

177 Finding a good approximation mesh for the depth  $y$  can be problematic because  $y$  has an unbounded range, so instead  
 178 we use the exponential depth  $z$  where  $z = e^{-y}$ ,  $0 \leq z \leq 1$ . **With an abuse of notation**, for a function of depth  $f(y)$  we define  
 179  $f(z) = f(-\ln(z))$ .

180 Similar to Step One, we apply the following mesh approximation to (7), (but now with  $\bar{\psi}_i(z) = \delta[z = z_i]$ , option (2) in the  
 181 discussion on Mesh Approximation).

182

183

184

185

186

## 187 Depth Model Approximations

188

$$\begin{aligned}
 \mu_k(y) &= \sum_m \mu_{km} \phi_m(z) \text{ Transformed intensity} \\
 \rho_k(z) &= \sum_m \rho_{km} \phi_m(z) \text{ Transformed boundary conditions} \\
 189 \quad \rho_{kh} &= \omega Q^{-1} (B - \omega BKB)^{-1} BKD(z_h) p_0 \\
 D_{ij}(z) &= \int z^{1/v} \phi_j(v) \phi_j(v) dv
 \end{aligned}$$

190 From this and (7) we get the following.

$$\begin{aligned}
 v_k > 0 &\implies \mu_{km} = \mu_{0k} F_{kh} + (1/v_k) \rho_{km} G_{kmh} \\
 v_k = 0 &\implies \mu_{km} = \rho_{kh} \\
 v_k < 0 &\implies \mu_{km} = -(1/v_k) \rho_{km} G_{kmh}
 \end{aligned}$$

191 where

$$192 \quad F_{km} = z_m^{1/v_k}$$

193 and

$$v_k > 0 \implies G_{khm} = \int_0^1 \int_0^z z_h^{-1} (z_h/\zeta)^{1+1/v_k} d\zeta dz$$

$$v_k = 0 \implies G_{khm} = \chi[h = m]$$

$$v_k < 0 \implies G_{khm} = \int_0^1 \int_z^1 z_h^{-1} (z_h/\zeta)^{1+1/v_k} d\zeta dz$$

194 Taken together, these allow us to compute  $\mu$  and  $M$  under the natural reflectance assumption.

195 Figure 6 shows the mesh points for relative velocity and exponential depth.

196

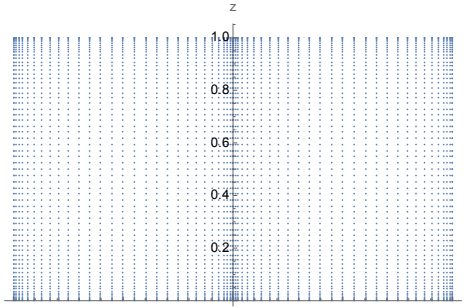

**Figure 6.** Mesh points for relative velocity and exponential depth.

197 The general solution for radiative transfer for a medium with finite depth and two boundaries, top and bottom can be  
 198 expressed as the linear combination of a one-boundary solution for the top boundary and a one-boundary solution for the  
 199 bottom boundary.

200 Let  $\Phi$  be the fundamental solution for (3), so that  $M = \Phi p_0$ . With an abuse of notation, we replace the indices by the  
 201 underlying mesh points e.g.  $M_i(y) = M(v_i, y)$ . We then note that the solution for a system with a bottom boundary is given by a  
 202 depth-reversal of the solution for a system with a top boundary.

$$\tilde{M}^{top}(v_i, y) = \sum_{w_j \geq 0} \Phi(v_i, w_j, y) r_0(w_j)$$

$$\tilde{M}^{bot}(v_i, y) = \sum_{w_j \leq 0} \Phi_R(v_i, w_j, b - y) r_b(w_j) \quad (8)$$

$${}^R\Phi(v_i, w_j, b - y) = \Phi(-v_i, -w_j, b - y)$$

203 where

$b$  depth of bottom boundary

$\tilde{M}^{top}$  solution to top-boundary problem under natural reflectance assumption

204  $\tilde{M}^{bot}$  solution to bottom boundary problem under natural reflectance assumption

${}^R\Phi$  depth-reversed fundamental solution

$r_0(w_j)$  downwards illumination of top boundary ( $w_j \geq 0$ )

$r_b(w_j)$  upwards illumination of bottom boundary ( $w_j \leq 0$ )

205 Both the downwards and upwards system satisfy the base integro-differential equation (3). A linear combination of the two sets  
206 of solutions has the same degrees of freedom as the two-boundary problem, so a linear combination of the two will span the  
207 solution set.

208 To find that solution, first let's decompose the systems into downwards flows ( $v \geq 0$ ) and upwards flows ( $v \leq 0$ ).

$$\begin{bmatrix} I_y^\uparrow \\ I_y^\downarrow \end{bmatrix} = \begin{bmatrix} {}^R\Phi_{b-y}^\downarrow & \Phi_y^\uparrow \\ {}^R\Phi_{b-y}^\uparrow & \Phi_y^\downarrow \end{bmatrix} \begin{bmatrix} r_b^\uparrow \\ r_0^\downarrow \end{bmatrix}$$

209 where

210  $I_y^\uparrow$  Intensity of flow upwards at depth  $y$

211  $I_y^\downarrow$  Intensity of flow downwards at depth  $y$

212 From this we can determine the boundary input and output flows.

$$\begin{bmatrix} S_b^\uparrow \\ S_0^\downarrow \end{bmatrix} = \begin{bmatrix} {}^R\Phi_0^\downarrow & \Phi_b^\uparrow \\ {}^R\Phi_0^\uparrow & \Phi_0^\downarrow \end{bmatrix} \cdot \begin{bmatrix} r_b^\uparrow \\ r_0^\downarrow \end{bmatrix}$$

$$\begin{bmatrix} O_0^\uparrow \\ O_b^\downarrow \end{bmatrix} = \begin{bmatrix} {}^R\Phi_b^\downarrow & \Phi_0^\uparrow \\ {}^R\Phi_0^\uparrow & \Phi_b^\downarrow \end{bmatrix} \cdot \begin{bmatrix} r_b^\uparrow \\ r_0^\downarrow \end{bmatrix}$$

213 And so we have found the two-boundary system.

$$\begin{bmatrix} O_0^\uparrow \\ O_b^\downarrow \end{bmatrix} = \begin{bmatrix} {}^R\Phi_b^\downarrow & \Phi_0^\uparrow \\ {}^R\Phi_0^\uparrow & \Phi_b^\downarrow \end{bmatrix} \cdot \begin{bmatrix} {}^R\Phi_0^\downarrow & \Phi_b^\uparrow \\ {}^R\Phi_b^\uparrow & \Phi_0^\downarrow \end{bmatrix}^{-1} \cdot \begin{bmatrix} r_b^\uparrow \\ r_0^\downarrow \end{bmatrix}$$

214 where

215  $S_b^\uparrow$  Intensity of source input at bottom boundary at depth  $b$

216  $S_0^\downarrow$  Intensity of source input at top boundary at depth 0

217  $O_0^\uparrow$  Intensity of output from top boundary

218  $O_b^\downarrow$  Intensity of output from bottom boundary boundary

## 219 Numerical Investigations

220 For the numerical experiments, the mesh approximation for the relative velocity  $v$  had 61 sample points distributed as two arcs  
221 of shifted Chebeyshev points, to give additional resolution around the three points  $v = -1, 0, 1$ . The mesh approximation for  
222 the scaled depths  $0 \leq z \leq 1$  had 67 sample points distributed as shifted Chebeyshev points to provide additional resolution at  
223  $y = 0, \infty$ . The actual scaling used was  $z = e^{-y/\hat{y}_{05}}$  where  $\hat{y}_{05}$  is the two-stream estimate of the depth at which the transmission  
224 was reduced to 5% of the original source. This provides better resolution by the numerical algorithm when the test case has  
225 strong backscattering or forward scattering.

226 The test cases used the Henyey-Greenstein phase function parametrized by  $g$  the asymmetry parameter, which in this case is  
227 equal to the average scatter angle relative to an incident angle.

228 The 957 test cases used all pairs of 33 values of the asymmetry parameter (= average scattering angle)  $g$  and 29 values of  
229 the scattering fraction  $\omega$  (= probability of scatter given extinction, =  $1 - \text{probability of absorption given extinction}$ ).

| var        | definition               | distribution       | number | min       | max       |
|------------|--------------------------|--------------------|--------|-----------|-----------|
| $v_i$      | relative velocity        | double chebyshev   | 61     | -1        | 1         |
| $z_i$      | scaled exponential depth | chebyshev          | 67     | 0         | 1         |
| $g_i$      | asymmetry factor         | chebyshev          | 33     | -0.998867 | 0.998867  |
| $\omega_i$ | single scatter albedo    | modified chebyshev | 29     | 0.0014660 | 0.9999995 |

Figure 7. Test case parameters

230 Figure 7 shows the parameters for the test cases. Figure 8 shows the mesh points for the asymmetry parameter and the  
231 single scatter albedo.

232 The Python implementation took 2.45 seconds per test case. The Mathematica implementation took 23.5 seconds per test  
233 case.

## 234 Asymptotic Diffusion Distribution

235 As shown in Figures 4 and 5 and discussed below, each material has a unique largest eigenvalue  $\nu$  greater than 1 and a unique  
236 positive eigenvector. The rate of attenuation for each eigenvector is the reciprocal of the corresponding eigenvalue, so this

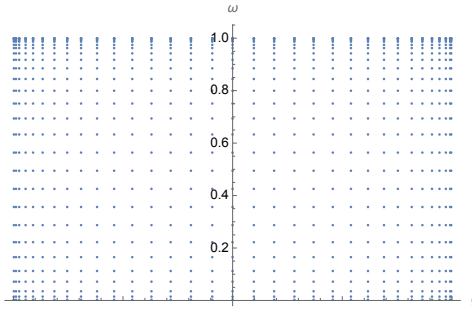

**Figure 8.** Mesh points for asymmetry parameter and the single scatter albedo

237 positive eigenvector has the slowest rate of attenuation among the diffuse components of the intensity. Since the largest  
 238 eigenvalue is also greater than 1, it's rate of attenuation is also slower than the rate of attenuation of the direct component.

239 Hence the positive eigenvector represents the asymptotic limit of the distribution of the intensity as the optical depth  
 240 increases, and the rate of convergence is given by the reciprocal of the eigenvalue. As shown in Figure 9, the maximum  
 241 eigenvalue (and hence the slowest decay in diffusion) increases as absorption decreases ( $\omega \rightarrow 1$ ) and as the forward scattering  
 242 ratio increases ( $g \rightarrow 1$ ).

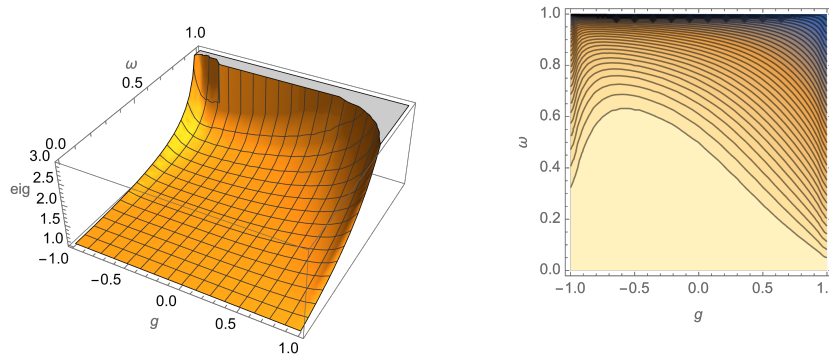

**Figure 9.** Maximum eigenvalues for varying asymmetry  $g$  and scatter fraction  $\omega$ .

243 Of interest here is that the maximum eigenvalue is close to one on the majority of the region. Such materials have a very  
 244 slow decay rate of diffusion relative to the direct component, so are in a strong sense effectively transparent. Given the direct  
 245 component source in Figure 10, Figure 11 shows the convergence of an opaque material to the diffusion limit, while Figure 12  
 246 shows a semi-transparent material where the direct component remains larger than the limiting diffuse component.

247 A material is *semi-transparent* if it allows the direct component to come through the material. If we define the *semi-*  
 248 *transparency depth* to be the maximum depth at which the direct component is at least 10% of the diffuse component, then any  
 249 material which is thinner than its transparency depth will be semi-transparent. Figures 13 and 14 show the transparency depths  
 250 and regions.

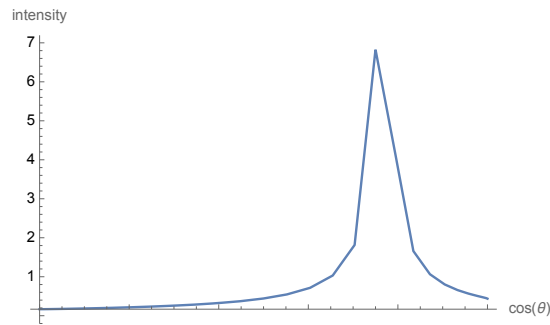

Figure 10. Direct source

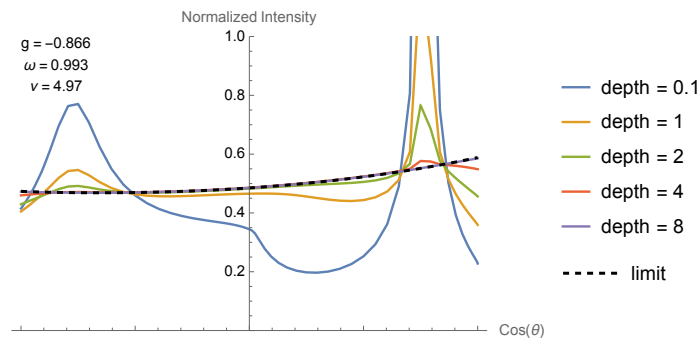

Figure 11. Convergence of normalized intensity distribution for  $\nu \gg 1$ .

## 251 Inherent and Apparent Optical Properties and the Difficulty of the Inverse Problem

252 The *Inherent Optical Properties*<sup>26</sup> (IOP) are the properties of a media that characterize its optical properties. For equation (1)  
 253 they consist of the optical depth, the scatter fraction, and the scattering matrix. Since the numerical investigations here assume  
 254 normalization by the optical depth and use the Henyey-Green one-parameter phase function, it is sufficient to use the scattering  
 255 asymmetry  $g$  and the scattering fraction  $\omega$ . This is also the common practice when using a two-stream approximation such as  
 256 the Kubelka-Munk formulation.

257 The *Apparent Optical Properties*<sup>26</sup> (AOP) are the observed optical properties of a media. Following common practice, we  
 258 look at the measured reflectance  $R$  and attenuation coefficient  $\eta$ .

259 The two-stream/Kubelka-Munk formulation provides simple analytic formulas for computing  $g$  and  $\omega$  from  $R$  and  $\eta$ , and  
 260 for the inverse. Unfortunately, numerical investigations show that the situation for the original problem is more complicated.

261 Figure 15 shows the reflectance and the attenuation coefficient at an optical depth of 0.75 for (a)  $g = 0.85$  as  $\omega$  varies from  
 262  $-1$  to  $1$ , (b)  $\omega = -1$  as  $g$  varies from  $0$  to  $1$ , and (c)  $\omega = 1$  as  $g$  varies from  $0$  to  $1$ , for the numerical simulation and for the  
 263 two-stream analytic approximation.

264 This illustrates the following:

- 265 1. The two-stream approximation agrees with the full system on the four boundaries,  $\omega = \pm 1$  and  $g = 0, 1$ ,
- 266 2. Overall error of the two-stream approximation is  $\approx 0.15$  as shown in Figure 16.

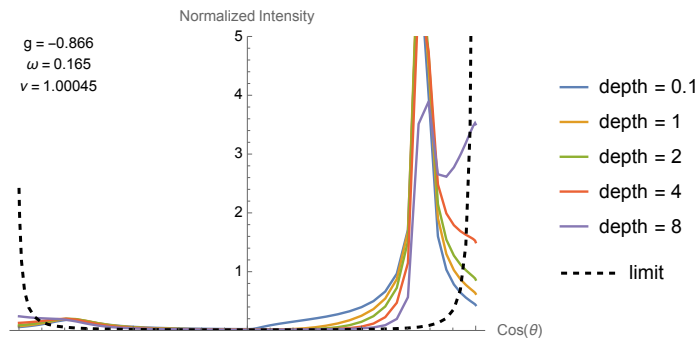

**Figure 12.** Convergence of normalized intensity distribution for  $v \approx 1$ .

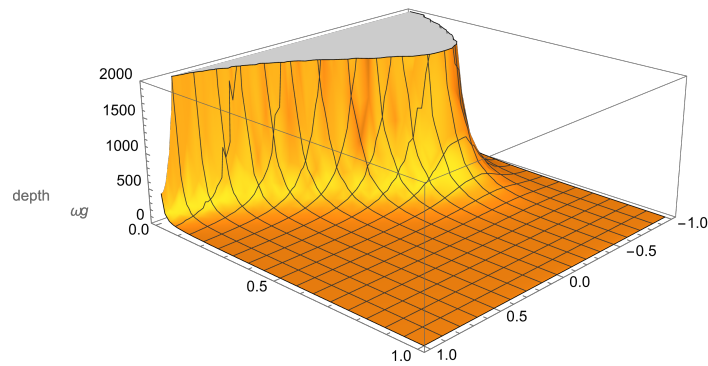

**Figure 13.** Semi-transparency depths for varying asymmetry  $g$  and scatter fraction  $\omega$ .

267 3. The reflectance  $R$  and attenuation coefficient  $\xi_{.75}$  (at transmission loss 0.75) do not uniquely determine the asymmetry  
 268  $g$  and scatter fraction  $\omega$  for  $g < -0.7$ .

269 If we look at the scatter diagrams at differing transmission loss depths in Figure 17, we see that the difficulty of invertibility  
 270 increases as the loss increases, the data lets us determine  $g$  and  $\omega$  at loss depths of less than 50%, or for  $g > -0.5$ , while  
 271 inversion becomes problematic for loss depths greater than 75% and  $g < -0.7$ .

## 272 **Methods**

273 All numerical investigations were conducted on a MacBook Pro with 2.6 GHz 6-Core Intel Core i7, 16Gb of RAM, running  
 274 Ventura V13.5.1. The final algorithm was coded in GNU Fortran 2008 as well as an implementation in Mathematica V13.1  
 275 using a Mathematica notebook, and Python V3.10.12 and numpy V1.25.1 using a Jupyter notebook V6.5.4. Six test cases were  
 276 developed based on the DISORT distribution, and timing studies were run compared to DISORT using the same compiler.

277 The accuracy of the implementation was established by hand comparisons to published tables /citevanhulst1980 (Table 35).

278 In order to validate the fortran implementation of EigenFlux, the distribution for the standard radiative transfer package  
 279 DISORT4 was downloaded from the *Light and Life Lab* website<sup>22</sup>, along with its standard test suite. The Eigenflux software  
 280 was then run on the DISORT test suite excluding the unimplimented features- thermal emissions and generalized BDRF

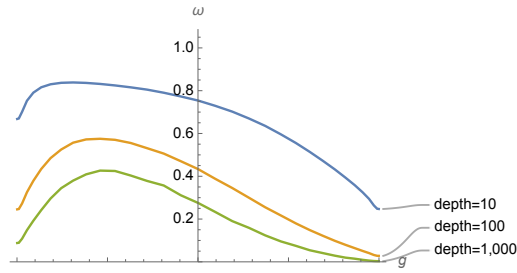

**Figure 14.** Regions for semi-transparency depths 10, 100, 1,000.

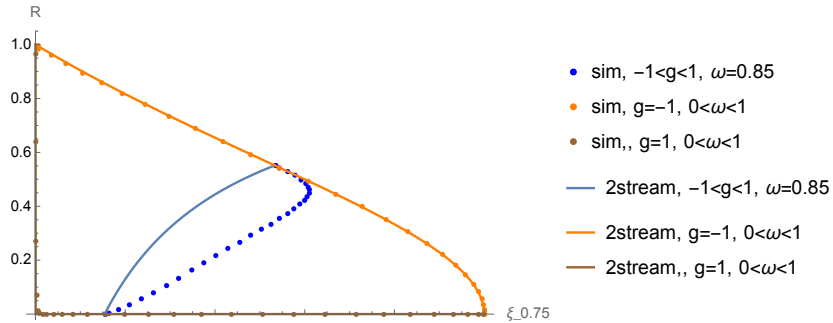

**Figure 15.** Reflectance and Attenuation Coefficient at 0.75 loss depth as computed by simulation and two-stream approximation.

281 functions, and compared to the reference DISORT results. See Figure 18.

## 282 Additional Topics

### 283 Hilbert Space Spectrum and Eigenvalues

284 In this section we show that much of the structure of the eigenvalues seen in figure 4 for a range of scattering fractions and  
 285 asymmetry factors is reflected by the structure of the spectrum of the original equation (2) considered as a Hilbert space  
 286 operator.

287 We exploit the spectral theory for Hilbert operators<sup>9</sup>. We rewrite the RHS of equation (2) as linear operators over the Hilbert  
 288 space  $L^2[-1, 1]$  of measurable functions over the interval  $[-1, 1]$  with finite  $L^2$  norm where

$$\begin{aligned}
 A[y]f(v) &= vf(v) \\
 Kf(v) &= \int K(v, w)f(w)dw \\
 \rho &= \omega BKD(y)p_0
 \end{aligned}
 \tag{9}$$

289 and then (2) becomes

$$A[y]\partial_y M + (I - \omega K)M = \rho$$

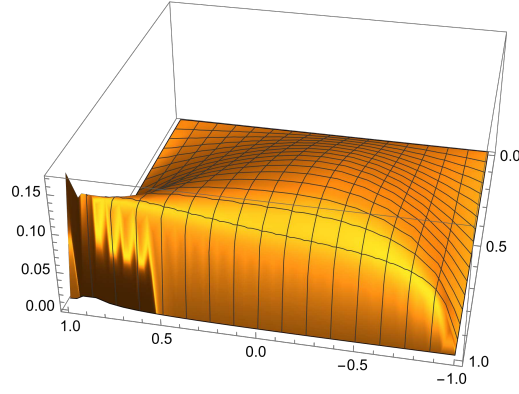

**Figure 16.** Absolute error in reflectance and attenuation coefficient for two-stream approximation, for  $-1 < g < 1$  and  $0 < \omega < 1$ .

290 and now we can look at the spectrum of the operator

$$H = (I - \omega K)^{-1} A[v]$$

291 In general, the spectrum of a bounded operator  $B$  is comprised of three parts:

- 292 1.  $\text{spec}_d$ : A discrete spectrum of "true" eigenvalues (e.g. for  $v \in \text{spec}(B)$ ,  $\exists f \in L^2, Bf = vf$ ). The set will be finite or  
293 countable, with the only allowed limit point at  $v = 0$ .
- 294 2.  $\text{essSpec}$ : A continuous spectrum of approximate eigenvalues (e.g. for  $v \in \text{essSpec}(N)$ , there exists a sequence of unit  
295 functions  $f_n \in L^2, \|Bf_n - vf_n\| \rightarrow 0$ ).
- 296 3.  $\text{spec}_r = \text{spec}_d(B^*) \setminus (\text{spec}_d(B) \cup \text{essSpec}(B))$ : A residual spectrum of eigenvalues of the adjoint operator which were not  
297 in  $\text{spec}_d$  or  $\text{essSpec}$ .

298 By its definition in (9), the operator  $K$  is an integral operator with doubly stochastic kernel, so is a compact operator. Since  
299  $H = A[v] + \omega KH$ , this means that  $H$  is a compact perturbation of  $A[v]$ .  $A[v]$  is also a Fredholm operator (provable through  
300 direct calculation of its kernel and co-kernels<sup>9</sup>). It then follows that  $\text{essSpec}(A[v]) = \text{essSpec}(H)$ , that the residual spectrum  
301  $\text{spec}_r$  is empty, and that the remaining spectrum  $\text{spec}_d(H) \setminus \text{essSpec}(H)$  consists of a finite number of isolated eigenvalues.

302 Furthermore,  $H$  is a positive operator on the positive half  $[0, 1]$  of the interval  $[-1, 1]$ , so it has a maximum eigenvalue  
303  $v_{max} = \|H\|$ , and the corresponding eigenvector is positive and is the only positive eigenvector for that subspace.

304 Similar considerations for the negative half lead to the overall conclusion that  $H$  will have two isolated eigenvalues  $\pm \|H\|$ ,  
305 each with a positive eigenvector, and those two eigenvectors are the only two positive members of the overall eigenspace.

306 From direct calculation on  $A[v]$ , we find that  $A[v]$  ( and therefore  $H$ ) has a continuous distribution of spectrum values from  
307  $-1$  to  $1$ , each value associated with a spectral function with a jump discontinuity at the spectrum value.

308 These conclusions are consistent with what we see in Figure 4 and Figure 5.

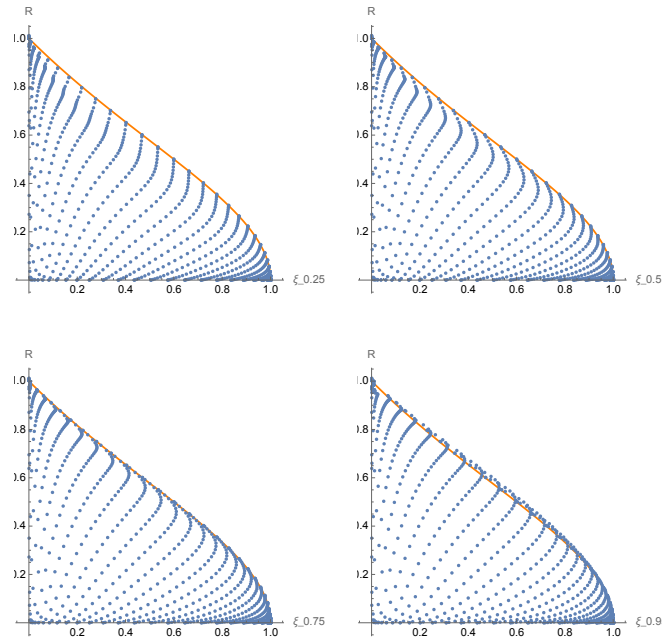

**Figure 17.** Scatter diagrams for reflectance  $R$  and attenuation coefficient  $\xi$  at loss depths of 25%, 50%, 75%, and 95%.

| Test Case | EigenFlux (ms) | DISORT (ms) |
|-----------|----------------|-------------|
| 1         | 340            | 404         |
| 2         | 200            | 310         |
| 3         | 104            | 33          |
| 4         | 9083           | 5188        |
| 5         | 4089           | 680         |
| 6         | 131            | 127         |

**Figure 18.** Test run results.

### 309 Incorporating Azimuth-dependence

310 Given a non-vertical collimated beam source, the intensity will be azimuth-dependent. While any azimuth dependence in the  
 311 individual particles may be azimuth-dependent, it disappears when averaging over the random orientations of the particles.  
 312 Nonetheless, even with a rotationally symmetric phase function, the scattering matrix will in general be azimuth-dependent.

313 Let the (averaged) phase function be given by  $k(v)$ . Then the scattering matrix will be given by

$$K(v_s, v_i; a_s - a_i) = k(v_s v_i + \cos(a_s - a_i) \sqrt{1 - v_s^2} \sqrt{1 - v_i^2})$$

314 where

315  $(v_i, a_i)$  Polar cosine and azimuth angle of incident vector

316  $(v_s, a_s)$  Polar cosine and azimuth angle of scattered vector

317 Under these conditions the main equation (2) becomes

$$\begin{aligned} I(v, a; y) + v \partial_y I(v, a; y) &= \omega \int K(v, w; a - b) P(w, b; y) dw \\ I(v, a; 0) &= s(v, a) \end{aligned} \quad (10)$$

318 Note that  $K(v, w; a)$  is cyclic in  $a$ , i.e.  $K(v, w; a + 2\pi) = K(v, w; a)$  and is the only term in the equation that is azimuth-  
319 dependent other than the boundary condition. As a result, the fundamental solution will be cyclically symmetric in azimuth

$$\Phi(v, a; w, b; y) = \Phi(v, a - b; w, 0; y) = \Phi(v, a - b + 2\pi; w, 0; y)$$

320 We apply the mesh approximation process to the azimuth-dependent diffuse intensity equation (10) above) with the  
321 additional property that all functions/matrices (other than  $p_0(v, a)$ ) that are dependent on azimuth are cyclically symmetric.

### 322 **Model Approximations**

$$\begin{aligned} K(v, w; a - b) &= \sum_{jpc} K_{jpc} \phi_j(v) \phi_p(w) \tilde{\phi}_c(a - b) && \text{Phase function kernel} \\ p_0(v; a) &= \sum_{jc} p_{0jc} \phi_j(v) \tilde{\phi}_c(a) && \text{Intensity at surface} \\ M(v, y; a - b) &= \sum_{jc} M_{jc}(y) \phi_j(v) \tilde{\phi}_c(a - b) && \text{Diffuse intensity distribution} \\ \tilde{\phi}_c(a - b) &= \tilde{\phi}_c(a - b + 2\pi) && \text{Azimuth test function} \end{aligned}$$

324 From this we derive the finite dimensional linear ODE.

$$\begin{aligned} \sum_{jc} A_{ij} \tilde{B}_{jfc} \partial_y M_{jc}(y) + \sum_{jc} B_{ij} \tilde{B}_{jfc} M_{jc}(y) - \omega \sum_{jpc} B_{ij} \tilde{C}_{fdc} K_{jpd} B_{pq} M_{qc}(y) \\ = \omega \sum_{jpc} B_{ij} \tilde{C}_{fdc} K_{jpd} D_{pq}(y) p_{0qc} \end{aligned} \quad (11)$$

325 where

$$326 \quad A_{ij} = \int v \psi_j(v) \phi_j(v) dv$$

$$327 \quad B_{ij} = \int \psi_j(v) \phi_j(v) dv$$

$$328 \quad C_{ij} = \int \phi_j(v) \phi_j(v) dv$$

$$329 \quad \tilde{B}_{fc} = \int \tilde{\psi}_f(a) \tilde{\phi}_c(a) da$$

$$330 \quad \tilde{C}_{fdc} = \int \tilde{\psi}_f(a) \tilde{\phi}_d(a-b) \tilde{\phi}_c(b) da db$$

$$331 \quad D_{ij}(y) = \int e^{-y/v} \phi_j(v) \phi_j(v) dv$$

332 More succinctly,

$$A\tilde{B} \partial_y M(y) + (B\tilde{B} - \omega B\tilde{C}KC)M(y) = \omega B\tilde{C}KD(y)p_0 \quad (12)$$

333 As before, the next step is to look at the eigenvalue decomposition of  $\tilde{R} = (B\tilde{B} - \omega B\tilde{C}KB)^{-1}A\tilde{B}$ . The matrix  $\tilde{R}$  has some  
334 special properties:

335 1.  $\tilde{R}$  is block circulant. I.e.  $\tilde{R}_{fcij} = \tilde{R}_{(f-c)0ij}$

336 2. The individual blocks of  $\tilde{R}$  are symmetric. I.e.  $\tilde{R}_{ij}^{fc} = \tilde{R}_{ji}^{fc}$

337 Because of (1) and (2), the eigenvalues and eigenvectors of  $\tilde{R}$  are real and can be determined from the number of blocks and  
338 the eigenvalue decomposition of a geometric sum of the individual blocks<sup>8,40,41</sup>. Let the blocks of  $\tilde{R}$  be given by  $R_{i-j}$ . Let  $\rho$   
339 be a primitive root of unity of order  $n$ , the number of blocks, so that  $\rho^n = 1$  and such that  $\{\rho^i\}$  generates a complete list of  
340 all roots of unity of order  $n$ . Let  $H(\rho) = \sum_j \rho^j R_{n-j}$ . Then the eigenvalues of  $\tilde{R}$  are the  $n * m$  eigenvalues of  $H(\rho^k)$ , and the  
341 eigenvectors are the outer product of  $\{\rho_k^j\}$  and the eigenvectors of  $H(\rho^k)$ .

## 342 Data Availability

343 Materials described in the manuscript are available from the University of Copenhagen Electronic Research Data Archive at  
344 address: <https://doi.org/10.17894/ucph.cfd8e267-97f3-496d-b434-e29984b931c8>

## 345 References

- 346 1. Akbari, H., *et al.* "Cool colored materials for roofs" *Proceedings of American Council for an Energy Efficient Economy*  
347 Asilomar Conference Center in Pacific Grove, CA., Aug. 2004
- 348 2. Akkaynak, D. & Treibitz, T. "Sea-Thru: A Method for Removing Water From Underwater Images," *2019 IEEE/CVF*  
349 *Conference on Computer Vision and Pattern Recognition (CVPR)*, Long Beach, CA, USA, 2019, pp. 1682-1691, 2019
- 350 3. Blinn, J. F. "Light reflection functions for simulation of clouds and dusty surfaces" *Computer Graphics*, 16(3), 21-29 1982

- 351 **4.** Buras, R. & Mayer, B. "Efficient unbiased variance reduction techniques for Monte Carlo simulations of radiative transfer in  
352 cloudy atmospheres: The solution", *J. Quant. Spectrosc. Radiat. Transfer*, 112,434–447, 2011
- 353 **5.** Chandrasekhar, S. *Radiative Transfer*, Oxford Publications, Oxford, 1950 (reprinted Dover Publications, New York, NY,  
354 1960.)
- 355 **6.** Chwolson, O. D. "Grundzüge einer mathematischen Theorie der inneren Diffusion des Lichtes". *Bull. Acad. Imp. Sci. St.*  
356 *Petersburg*, Nouvelle Série I (XXXIII), 221-256. 1889.
- 357 **7.** Coakley, J. A. "Reflectance and Albedo, Surface" *Encyclopedia of Atmospheric Sciences* Elsevier, 2003
- 358 **8.** Davis P.R. *Circulant Matrices*, John Wiley, New York. 1979.
- 359 **9.** Davis P.R. *Linear Operators and their Spectra*, Cambridge Studies in Advanced Mathematics 106, Cambridge University  
360 Press, Cambridge, UK. 2007.
- 361 **10.** d'Eon, E. *A Hitchhiker's Guide to Multiple Scattering* <http://www.eugenedeon.com.hitchhikers>
- 362 **11.** Eddington, A.S. "On the radiative equilibrium of the stars" *Monthly Not. of the Royal Astro. Soc.* 77, 16-35 1916
- 363 **12.** Emde, C., Buras, R., Mayer, B., & Blumthaler, M. "The impact of aerosols on polarized sky radiance: model development,  
364 validation, and applications", *Atmos. Chem. Phys.*, 10, 383–396, 2010.
- 365 **13.** Emde, C., *et al.* "The libRadtran software package for radiative transfer calculations (version 2.0.1)", *Geosci. Model Dev.*,  
366 9, 1647–1672 2016
- 367 **14.** Goody, R. M. & Yung, Y. L. *Atmospheric Radiation, Theoretical Basis, 2nd Ed.*, Oxford University Press, New York 1989
- 368 **15.** HydroLight, *Radiative Transfer Software*, <https://www.numericaloptics.com/hydrolight.html>, 2020.
- 369 **16.** Kajiya, J. T. & Von Herzen, B. P. "Ray tracing volume densities" *Computer Graphics (Proceedings of SIGGRAPH '84, Vol.*  
370 18, 165-74 1984
- 371 **17.** Koleske, J. V. (ed.), *Paint and Coating Testing Manual*, ASTM, Philadelphia, PA, 14th Edition, 1995.
- 372 **18.** Kubelka, P. & Munk, F. "Ein Beitrage zur Optik der Farbenstriche" *Zeitschrift Fur Technische Physik*, #12, p. 593 1931
- 373 **19.** Kubelka, P. "New Contributions to the Optics of Intensely Light Scattering Materials– Part I" *Journal Optical Society of*  
374 *America*, #38, p448 1948
- 375 **20.** Levinson, R., Berdahl, P., & Akbari, H. "Solar spectral optical properties of pigments—Part I: model for deriving scattering  
376 and absorption coefficients from transmittance and reflectance measurements" *Solar Energy Materials and Solar Cells*,  
377 Volume 89, Issue 4, Pages 319-349
- 378 **21.** Liou, K. N. *An Introduction to Atmospheric Radiation, 2nd Ed.* Academic Press 2002
- 379 **22.** LLLab, "LLLab DISORT Website". Accessed July 21, 2023. <http://www.rtatmocn.com/disort/>

- 380 **23.** Lommel, E. "Die Photometrie der diffusen Zurückwerfung" *Sitzungsberichte der mathematische und physikalische Classe*  
381 *der Königlichen Bayerische Academie zu München.* 17, 95-132. 1887.
- 382 **24.** Milne, E. A. "Radiative Equilibrium in the Outer Layers of a Star: the Temperature Distribution and the Law of Darkening".  
383 *Monthly Notices Royal Astron. Soc.* 81(5), 361-375. 1921.
- 384 **25.** Mishchenko, M.I. "125 years of radiative transfer: Enduring triumphs and persisting misconceptions". *Radiation Processes*  
385 *in the Atmosphere and Ocean.* AIP Conf. Proc. 1531, 11-18. doi 10.1063/1.4804696. 2013.
- 386 **26.** Mobley, C.D. *Light and Water: Radiative Transfer in Natural Waters* Academic, San Diego. 1994
- 387 **27.** Nicodemus, F.E., Richmond, J.C., Hsia, J.J., Ginsberg, I.W. & Limperis, T. *Geometrical Considerations and Nomenclature*  
388 *for Reflectance,* National Bureau of Standards, October, 1977
- 389 **28.** NIST, *Digital Library of Mathematical Functions,* <https://dlmf.nist.gov>, Oct. 19, 2020.
- 390 **29.** Petty, G. W. *A First Course in Atmospheric Radiation,* Sundog Publishing, Madison, WI, 2nd edition, 2006.
- 391 **30.** M. Pharr, W. J. & Humphreys, G., *Physically Based Rendering, Fourth Edition: From Theory to Implementation,* MIT  
392 Press, 2023
- 393 **31.** Preisendorfer, R. W. "A survey of theoretical hydrologic optics", *Journal of Quantitative Spectroscopy and Radiative*  
394 *Transfer,* Vol. 8, Issue 1, Pages 325-338, 1968 [https://doi.org/10.1016/S0022-4073\(68\)80116-5](https://doi.org/10.1016/S0022-4073(68)80116-5).
- 395 **32.** Preisendorfer, R. W. *Hydrologic Optics,* in 6 volumes: *Vol. 1: Introduction,* NTIS PB-259 793/8ST; *Vol. 2: Foundations,*  
396 *NTIS PB-259 794/6ST; Vol. 3: Solutions,* NTIS PB-259 795/3ST; *Vol. 4: Imbeddings,* NTIS PB-259 796/1ST; *Vol. 5:*  
397 *Properties,* NTIS PB-259 797/19ST; *Vol. 6: Surfaces,* NTIS PB-268 704/4ST; Pacific Mar. Environ. Lab/NOAA, Seattle,  
398 WA. 1976
- 399 **33.** Raman, C.V. "On the molecular scattering of light in water and the colour of the sea" *Proc. R. Soc. Lond. A* 101:64–80  
400 <https://royalsocietypublishing.org/doi/10.1098/rspa.1922.0025> 1922
- 401 **34.** Rayleigh, Lord., "On the light from the sky, its polarization and colour", *Phil. Mag.*,41:107-120. 274-279. 1871.
- 402 **35.** Schuster, A., "Radiation through a foggy atmosphere". *Astrophys. J.* XXI(I), 1-22. 1905.
- 403 **36.** Schwarzschild, K., "Ueber das Gleichgewicht der Sonnenatmosphäre". *Nachrichten von der Königlichen Gesellschaft der*  
404 *Wissenschaften zu Göttingen, Mathematische-Physikalische Klasse,* 195, 41-53. 1906.
- 405 **37.** Schwarzschild, K., "Über Diffusion and Absorption in der Sonnenatmosphäre". *Sitzungsberichte der Königlichen Preussis-*  
406 *chen Akademie der Wissenschaften,* 47, 1183-1202. 1914.
- 407 **38.** Shoulejkin, W. "On the Color of the Sea" *Phys. Rev.* 22, 85 1923
- 408 **39.** Stamnes, K., Tsay, S., Wiscombe, W. & Jayaweera, K., "Numerically stable algorithm for discrete-ordinate-method  
409 radiative transfer in multiple scattering and emitting layered media", *Applied Optics,* Vol. 27 page 2502, 1988

- 410 **40.** Tee, G.J. "A novel finite-difference approximation to the biharmonic operator", *The Computer Journal*, 6 (2), 177–192.  
411 MR29 #6646. 1963.
- 412 **41.** Tee, G. J. "Eigenvectors of Block Circulant and Alternating Circulant Matrices", *New Zealand Journal of Mathematics*, 36:  
413 195–211. 2007.
- 414 **42.** Thomas, G. E., & Stamnes, K. *Radiative Transfer in the Atmosphere and Ocean*, Cambridge University Press, Cambridge,  
415 UK, 1999. 2005
- 416 **43.** Torrance, K.E. & Sparrow, F.M. "Theory for Off-Specular Reflection From Roughened Surfaces" *J. OSA*, Vol. 57, #9,  
417 1105-1114, Sept. 1967
- 418 **44.** Van De Hulst, H. C., *Multiple Light Scattering, Tables, Formulas, and Applications, Vol 2*, Academic Press, New York  
419 1980.
